# Supplementary material for: Bioinformatic strategies for the analysis of genomic aberrations detected by targeted NGS panels with clinical application
Source: PeerJ. 2021 Mar 31;9:e10897. doi: 10.7717/peerj.10897 (PMC8019320; doi:10.7717/peerj.10897)
Supplement: Supplemental Information 2 [file peerj-09-10897-s002.xlsx]

## Sheet: Supplemental Table 2
Utility	Database	Description	Web access	Reference
Population databases	1000 Genome Project	Catalogue of the genetic variants with frequencies of at least 1% in the populations	https://www.internationalgenome.org	The 1000 Genomes Project Consortium, 2015
	dbSNP	Database contains human known single nucleotide, microsatellites, and small-scale insertions and deletions along	https://www.ncbi.nlm.nih.gov/snp/	Sherry et al., 2001
	GnomAD	Database aggregates and harmonizes both exome and genome sequencing data from a wide variety of large-scale sequencing projects	https://gnomad.broadinstitute.org/	Karczewski et al., 2019
Somatic mutation databases	COSMIC	The Catalogue Of Somatic Mutations In Cancer collects somatic mutations in human cancers	https://cancer.sanger.ac.uk/cosmic	Tate et al., 2019
	TCGA	Characterization over 20,000 cancer and matched normal samples spanning 33 different cancer types	https://portal.gdc.cancer.gov/	Cancer Genome Atlas Research Network et al., 2013
	IARC TP53 database	Various types of data and information on human cancer-related TP53 gene variations	http://p53.iarc.fr/	Bouaoun et al., 2016
Other databases	ClinVar	Public archive of reports of the relationships among human germline variations and phenotypes with supporting evidence	https://www.ncbi.nlm.nih.gov/clinvar/	Landrum et al., 2018
	HGMD	Collects all known (published) gene lesions responsible for human inherited disease	http://www.hgmd.cf.ac.uk/ac/index.php	Stenson et al., 2017
In-silico prediction tools	PolyPhen2	Predicts impact of an amino acid substitution on the structure and function of a human protein	http://genetics.bwh.harvard.edu/pph2/	Adzhubei et al., 2010
	SIFT	Prediction of the amino acid substitution affects to protein based on sequence homology and the physical properties of amino acids	https://sift.bii.a-star.edu.sg	Sim et al., 2012
	PROVEAN	Predicts whether an amino acid substitution or indel has an impact on the biological function of a protein	http://provean.jcvi.org/index.php	Choi & Chan, 2015
Searching for publications	PubMed	Comprises more than 24 million citations for biomedical literature from MEDLINE, life science journals, and online books.	https://www.ncbi.nlm.nih.gov/pubmed/
